# Supplementary material for: Influence of Extremely High Pressure and Oxygen on Hydrocarbon-Enriched Microbial Communities in Sediments from the Challenger Deep, Mariana Trench
Source: MDPI journal article supplement (doi:10.3390/microorganisms11030630), 2023-03-01
Supplement: s1 [file s1]

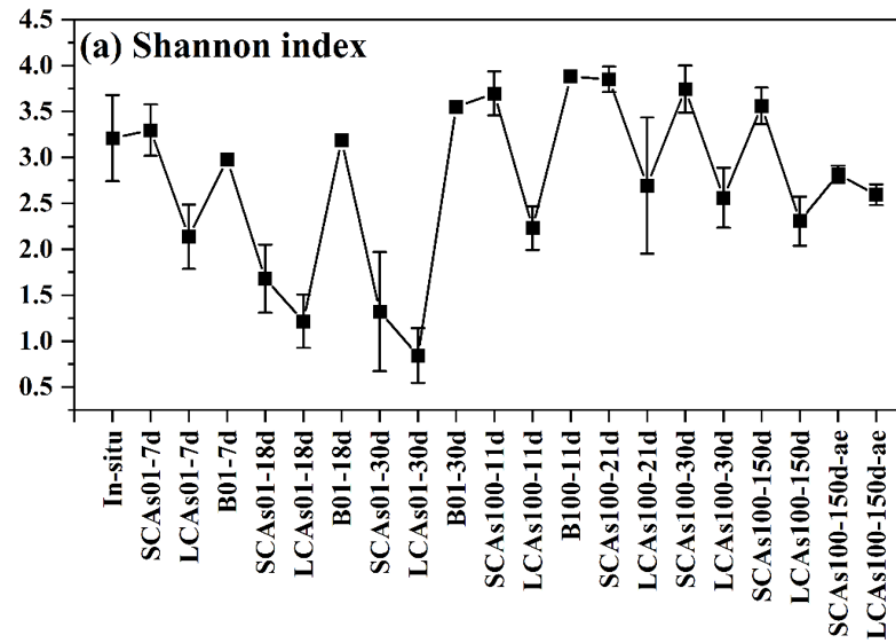

**Figure S1.** The temporal variations of Shannon index in microbial communities with aerobic and anaerobic n-alkanes enrichments at 0.1 and 100 MPa in the sediments of Mariana Trench.

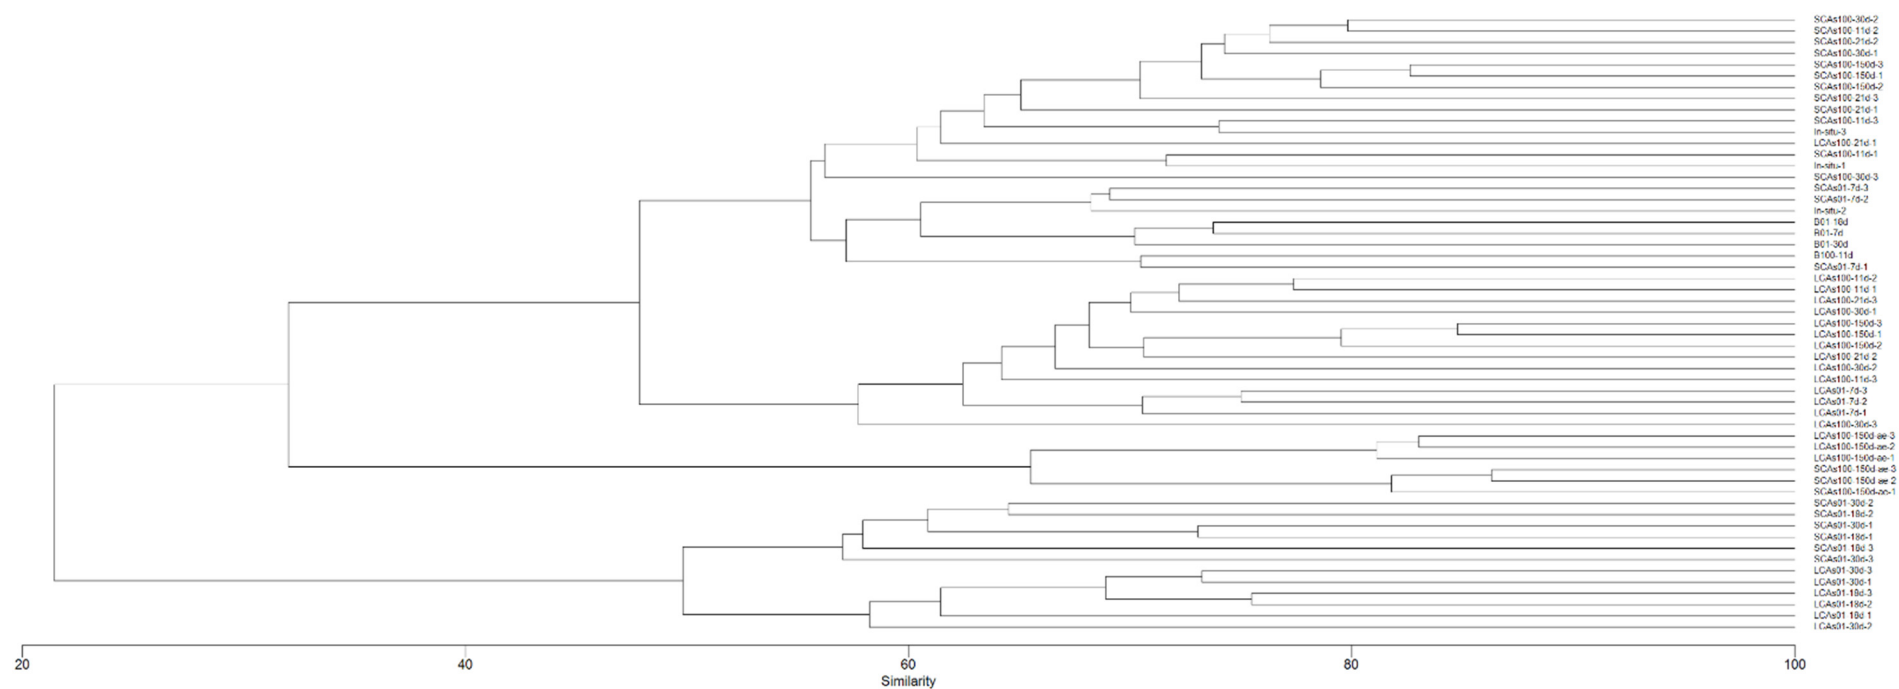

**Figure S2.** Hierarchical cluster analysis of microbial communities for aerobic and anaerobic hydrocarbon enrichments at 0.1 and 100 MPa in the sediments of Mariana Trench.
